# Supplementary material for: Effect on the geometry over the slow relaxation of the magnetization in a series of erbium(iii) complexes based on halogenated ligands
Source: Royal Society of Chemistry journal article supplement (doi:10.1039/d2ce00856d), 2022-01-01
Supplement: d2ce00856d1.pdf [file d2ce00856d1.pdf]

SUPPORTING INFORMATION

**Effect on the coordination number over the slow relaxation of the magnetization in a series of Erbium(III) complexes based on halogenated ligands**

**Jérôme Long,<sup>\*a,b</sup> Dmitry M. Lyubov,<sup>c,d</sup> Alexander A. Kissel',<sup>d</sup> Ilia A. Gogolev,<sup>d</sup> Andrey A. Tyutyunov,<sup>d</sup> Yulia V. Nelyubina,<sup>d</sup> Fabrice Salles,<sup>a</sup> Yannick Guari,<sup>a</sup> Anton V. Cherkasov,<sup>c</sup> Joulia Larionova<sup>a</sup> and Alexander A. Trifonov<sup>\*c,d</sup>**

<sup>a</sup> ICGM, Univ. Montpellier, CNRS, ENSCM, Montpellier, France. E-mail: [jerome.long@umontpellier.fr](mailto:jerome.long@umontpellier.fr)

<sup>b</sup> Institut Universitaire de France (IUF), 1 rue Descartes, 75231 Paris Cedex 05, France.

<sup>c</sup> Institute of Organometallic Chemistry of Russian Academy of Sciences, 49 Tropinina str., GSP-445, 603950, Nizhny Novgorod, Russia. E-mail: [trif@iomc.ras.ru](mailto:trif@iomc.ras.ru)

<sup>d</sup> A.N. Nesmeyanov Institute of Organoelement Compounds of Russian Academy of Sciences, 28 Vavilova str., 119334, Moscow, Russia.

## TABLE OF CONTENTS

|                                                                                                                                                                                                                                                                                                                                                                                                                                                   |    |
|---------------------------------------------------------------------------------------------------------------------------------------------------------------------------------------------------------------------------------------------------------------------------------------------------------------------------------------------------------------------------------------------------------------------------------------------------|----|
| Figure S1: Perspective view of the crystal packing for 1- 5 along some crystallographic axes. Hydrogen atoms have been omitted for clarity.....                                                                                                                                                                                                                                                                                                   | 4  |
| Figure S2: Temperature dependence of $\chi T$ for 1 - 5. Samples 1, 4 and 5 were measured under an applied magnetic field of 1000 Oe, while the data for samples 2 and 3 were measured under a 10 kOe to decrease the contribution from temperature independent paramagnetism. Inset: field dependence of the magnetization at 1.8 K for 1-5. The red solid lines correspond to the calculated curves from the <i>ab initio</i> calculations..... | 5  |
| Figure S3: Frequency dependence of $\chi'$ and $\chi''$ for 1–5 for different temperatures performed under various dc fields.....                                                                                                                                                                                                                                                                                                                 | 6  |
| Figure S4: Cole-Cole (Argand) plots obtained using the ac susceptibility data for 5 (0 Oe). The solid lines correspond to the best fit obtained with a generalized Debye model.....                                                                                                                                                                                                                                                               | 7  |
| Figure S5: Frequency dependence of $\chi'$ and $\chi''$ for different temperatures performed under a 1500 (1) or 1000 Oe (5) dc field. ....                                                                                                                                                                                                                                                                                                       | 7  |
| Figure S6: Cole-Cole (Argand) plots obtained using the ac susceptibility data for 1 (1500 Oe) and 5 (1000 Oe). The solid lines correspond to the best fit obtained with a generalized Debye model.....                                                                                                                                                                                                                                            | 8  |
| Figure S7: Anisotropic axes (purple) for the KD ground state obtained from the <i>ab initio</i> calculations.....                                                                                                                                                                                                                                                                                                                                 | 9  |
|                                                                                                                                                                                                                                                                                                                                                                                                                                                   |    |
| Table S1: Crystal data and structure refinement details for 1-5. ....                                                                                                                                                                                                                                                                                                                                                                             | 10 |
| Table S2: SHAPE{Casanova, 2005 #267} analysis for 1-5. ....                                                                                                                                                                                                                                                                                                                                                                                       | 11 |
| Table S3: Fitting of the Cole-Cole plots with a generalized Debye model under a 0 Oe dc field for 5. ....                                                                                                                                                                                                                                                                                                                                         | 11 |
| Table S4: Fitting of the Cole-Cole plots with a generalized Debye model under a 1500 Oe dc field for 1.....                                                                                                                                                                                                                                                                                                                                       | 12 |
| Table S5: Fitting of the Cole-Cole plots with a generalized Debye model under a 1000 Oe dc field for 5.....                                                                                                                                                                                                                                                                                                                                       | 12 |
| Table S6: <i>Ab initio</i> calculated energies, <i>g</i> -tensor main values of the ground doublet and the $n^{\text{th}}$ KD doublet for the ground multiplet $J = 15/2$ obtained for 1. ....                                                                                                                                                                                                                                                    | 12 |
| Table S7: <i>Ab initio</i> calculated energies, <i>g</i> -tensor main values of the ground doublet and the $n^{\text{th}}$ KD doublet for the ground multiplet $J = 15/2$ obtained for 2. ....                                                                                                                                                                                                                                                    | 13 |
| Table S8: <i>Ab initio</i> calculated energies, <i>g</i> -tensor main values of the ground doublet and the $n^{\text{th}}$ KD doublet for the ground multiplet $J = 15/2$ obtained for 3. ....                                                                                                                                                                                                                                                    | 13 |
| Table S9: <i>Ab initio</i> calculated energies, <i>g</i> -tensor main values of the ground doublet and the $n^{\text{th}}$ KD doublet for the ground multiplet $J = 15/2$ obtained for 4. ....                                                                                                                                                                                                                                                    | 13 |
| Table S10: <i>Ab initio</i> calculated energies, <i>g</i> -tensor main values of the ground doublet and the $n^{\text{th}}$ KD doublet for the ground multiplet $J = 15/2$ obtained for 5. ....                                                                                                                                                                                                                                                   | 14 |
| Table S11: Weight of individual crystal-field parameters on the crystal-field splitting obtained by <i>Ab initio</i> for 5a. Only values larger than 1% are given.....                                                                                                                                                                                                                                                                            | 14 |
| Table S12: Weight of individual crystal-field parameters on the crystal-field splitting obtained by <i>Ab initio</i> for 5b. Only values larger than 1% are given.....                                                                                                                                                                                                                                                                            | 15 |



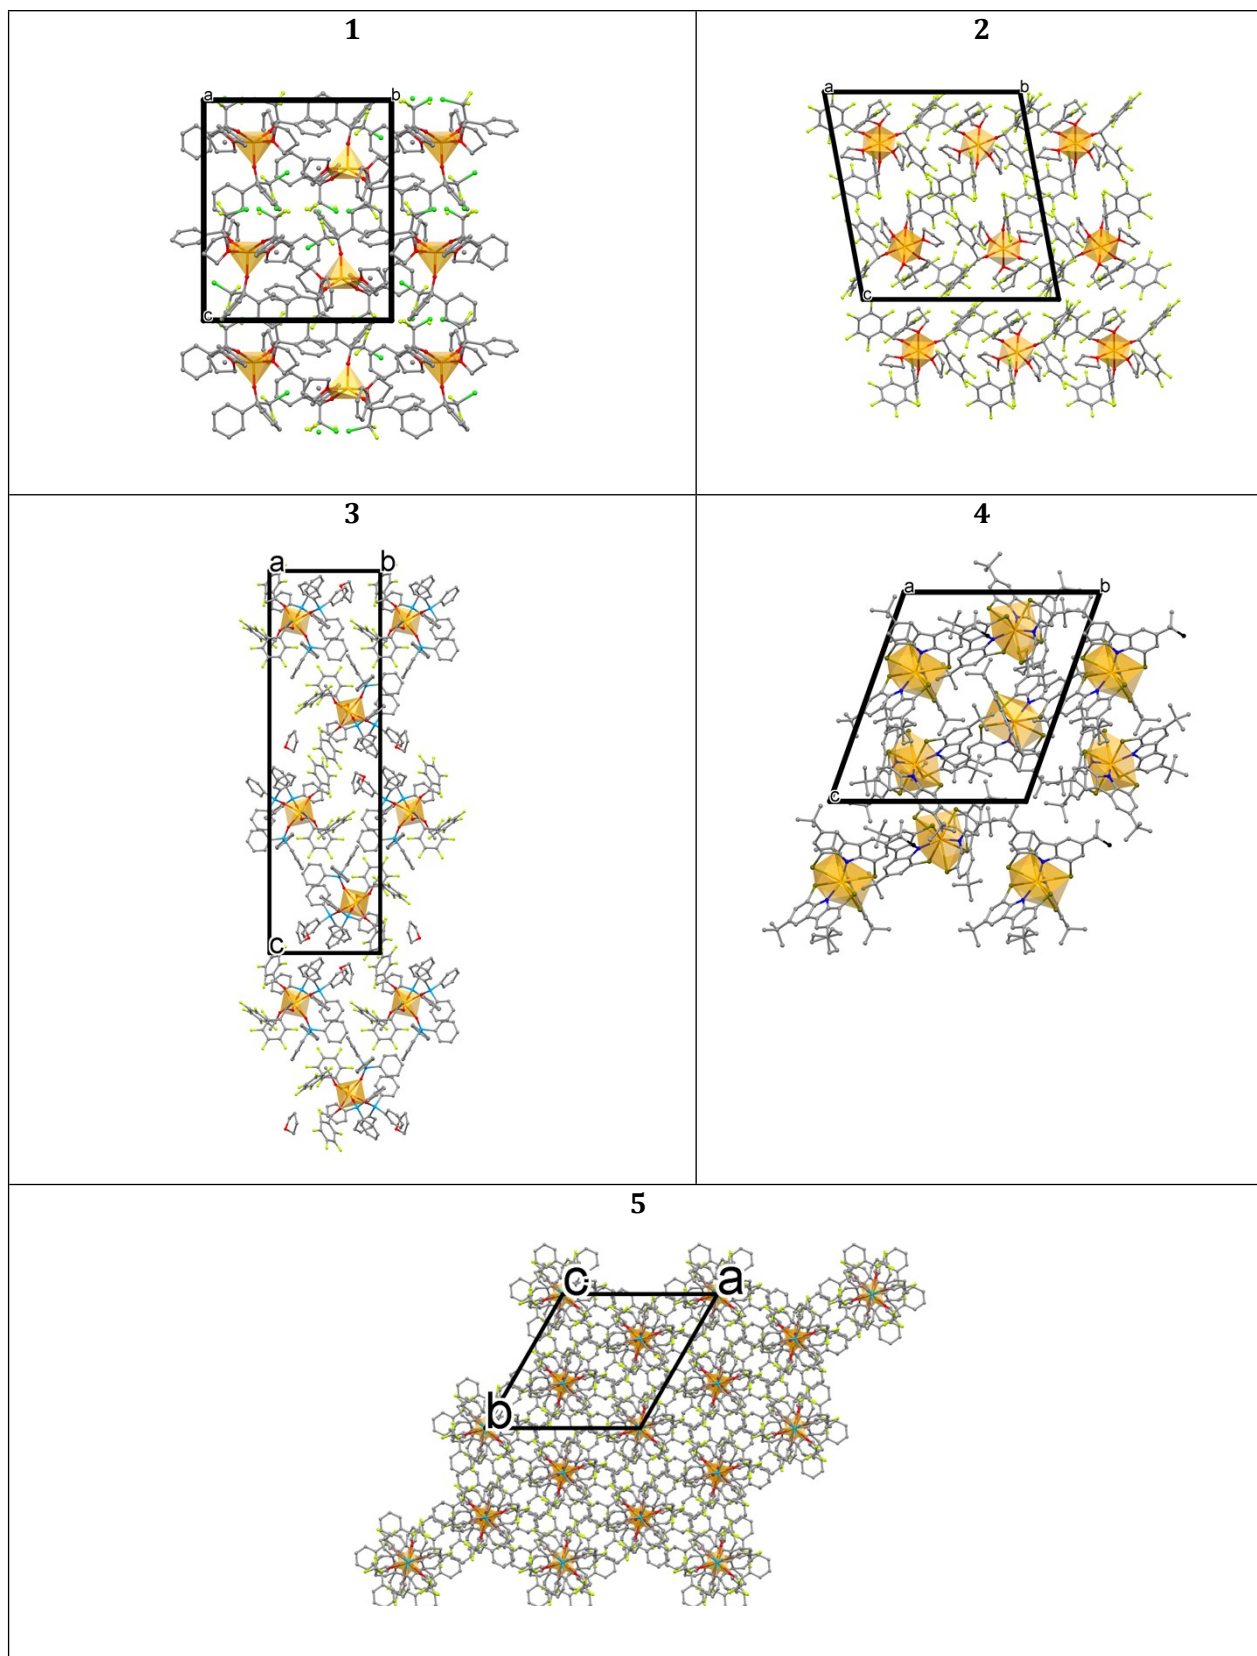

**Figure S1:** Perspective view of the crystal packing for 1- 5 along some crystallographic axes. Hydrogen atoms have been omitted for clarity.

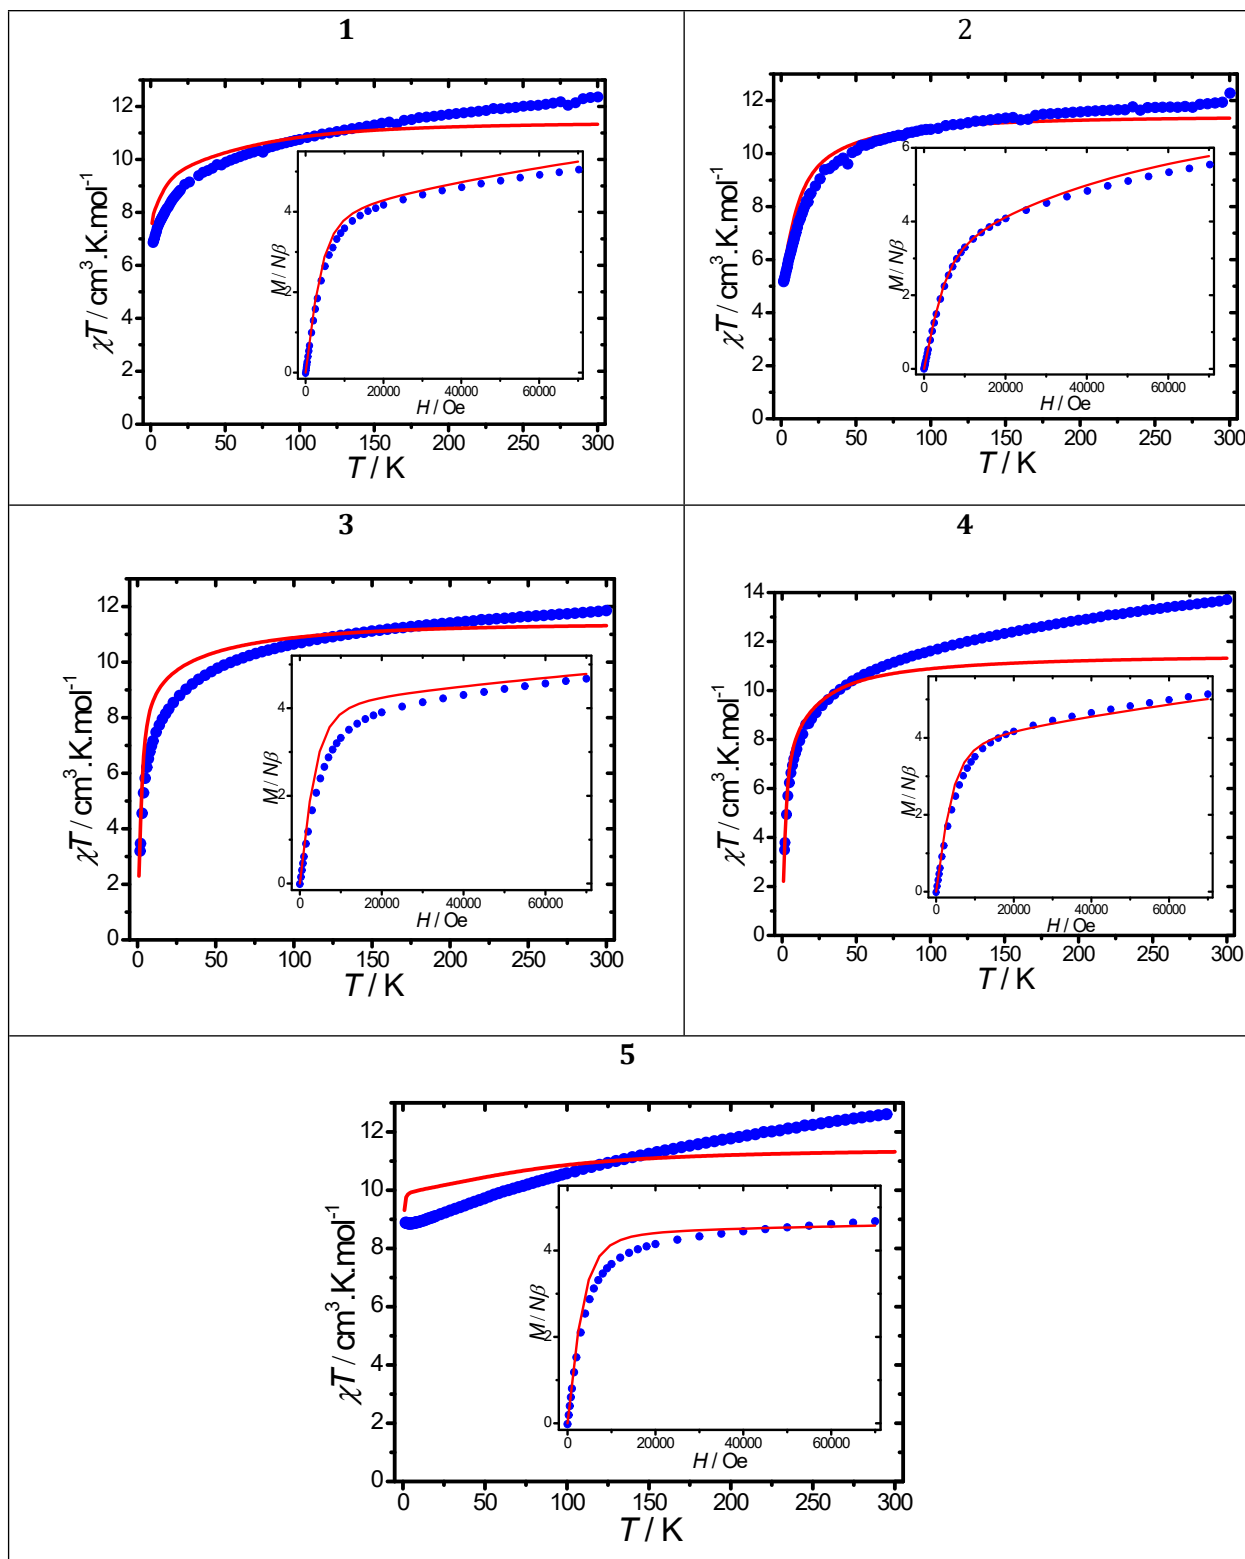

**Figure S2:** Temperature dependence of  $\chi T$  for 1 - 5. Samples 1, 2 and 5 were measured under an applied magnetic field of 1000 Oe, while the data for samples 3 and 4 were measured under a 10 kOe to decrease the contribution from temperature independent paramagnetism. Inset: field dependence of the magnetization at 1.8 K for 1-5. The red solid lines correspond to the calculated curves from the *ab initio* calculations.

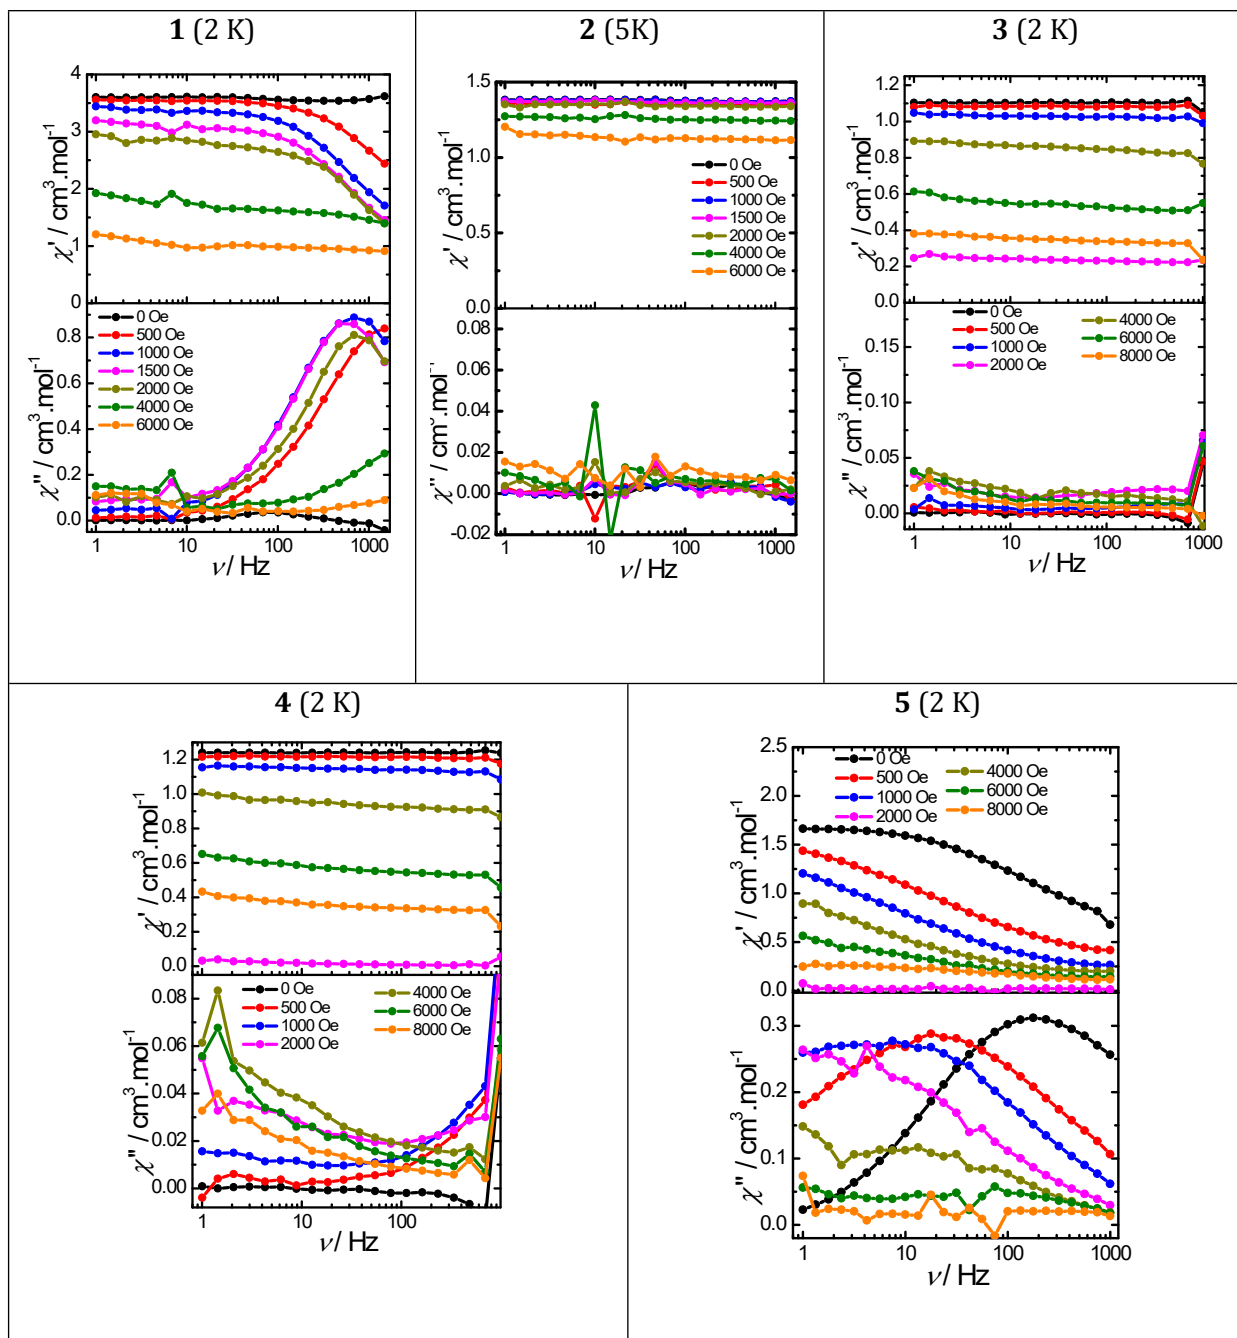

**Figure S3:** Frequency dependence of  $\chi'$  and  $\chi''$  for 1–5 for different temperatures performed under various dc fields.

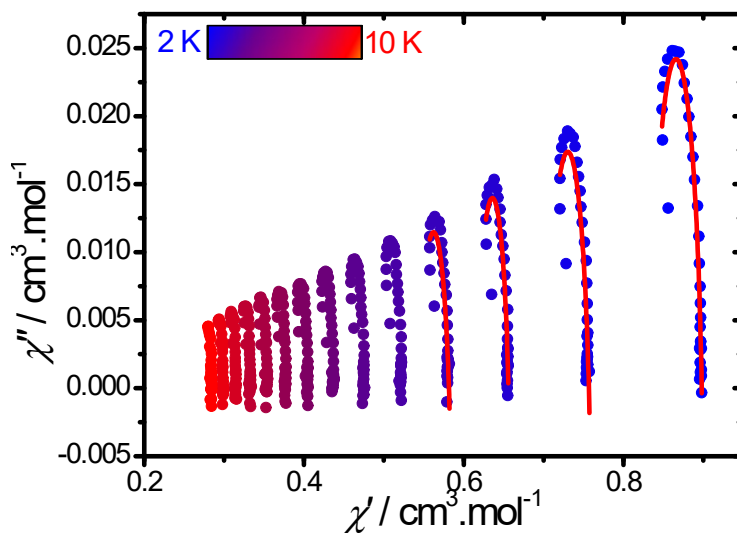

**Figure S4:** Cole-Cole (Argand) plots obtained using the ac susceptibility data for **5** (0 Oe). The solid lines correspond to the best fit obtained with a generalized Debye model.

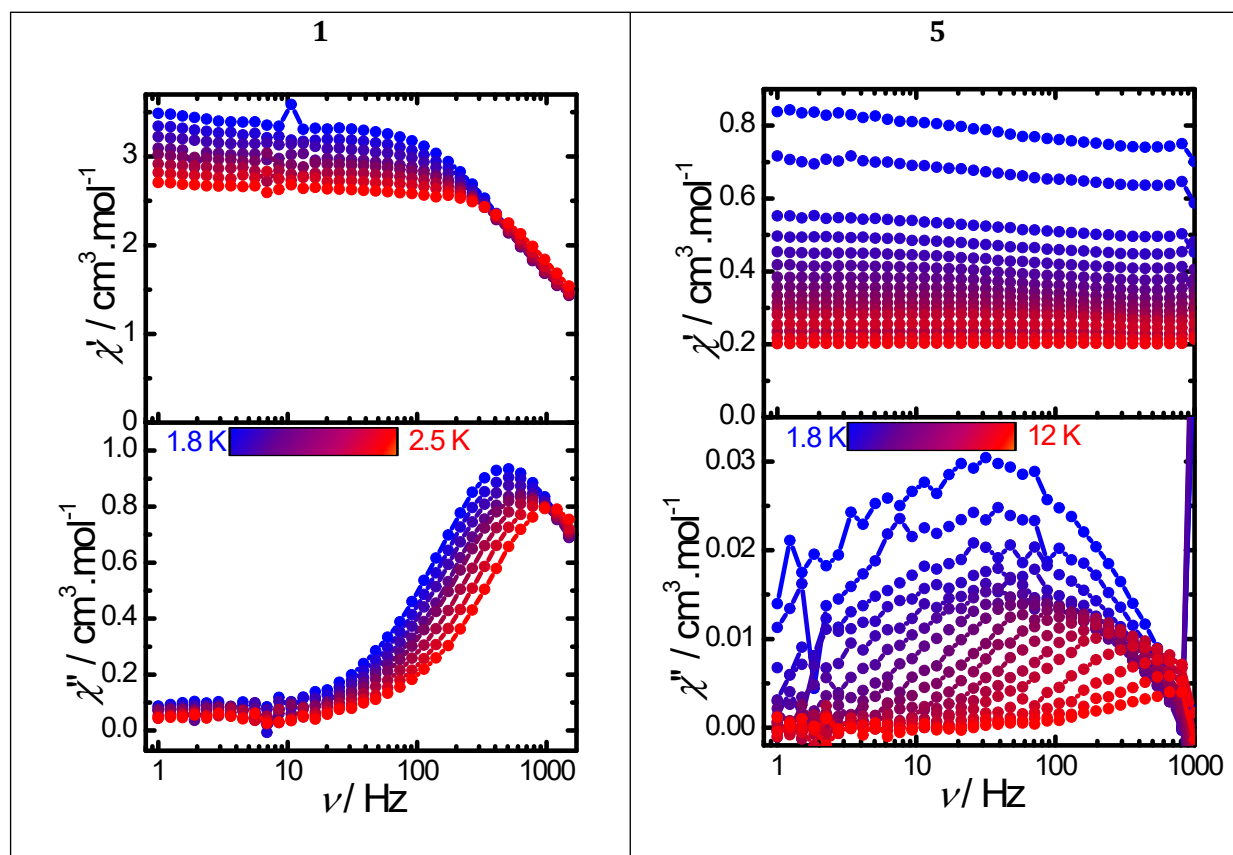

**Figure S5:** Frequency dependence of  $\chi'$  and  $\chi''$  for different temperatures performed under a 1500 (1) or 1000 Oe (5) dc field.

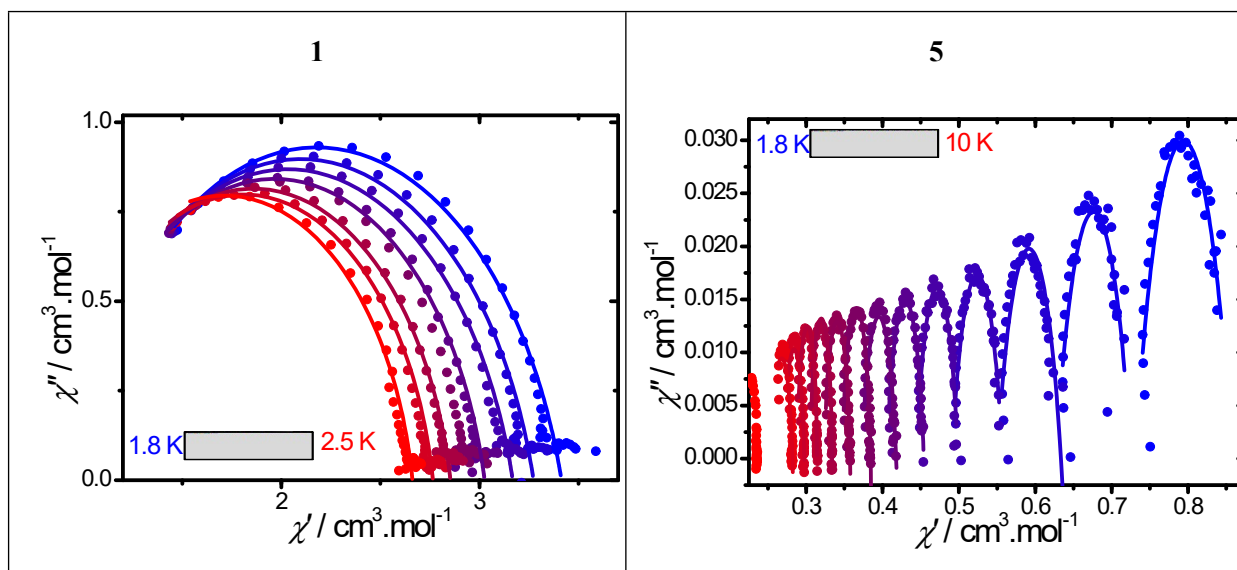

**Figure S6:** Cole-Cole (Argand) plots obtained using the ac susceptibility data for 1 (1500 Oe) and 5 (1000 Oe). The solid lines correspond to the best fit obtained with a generalized Debye model.



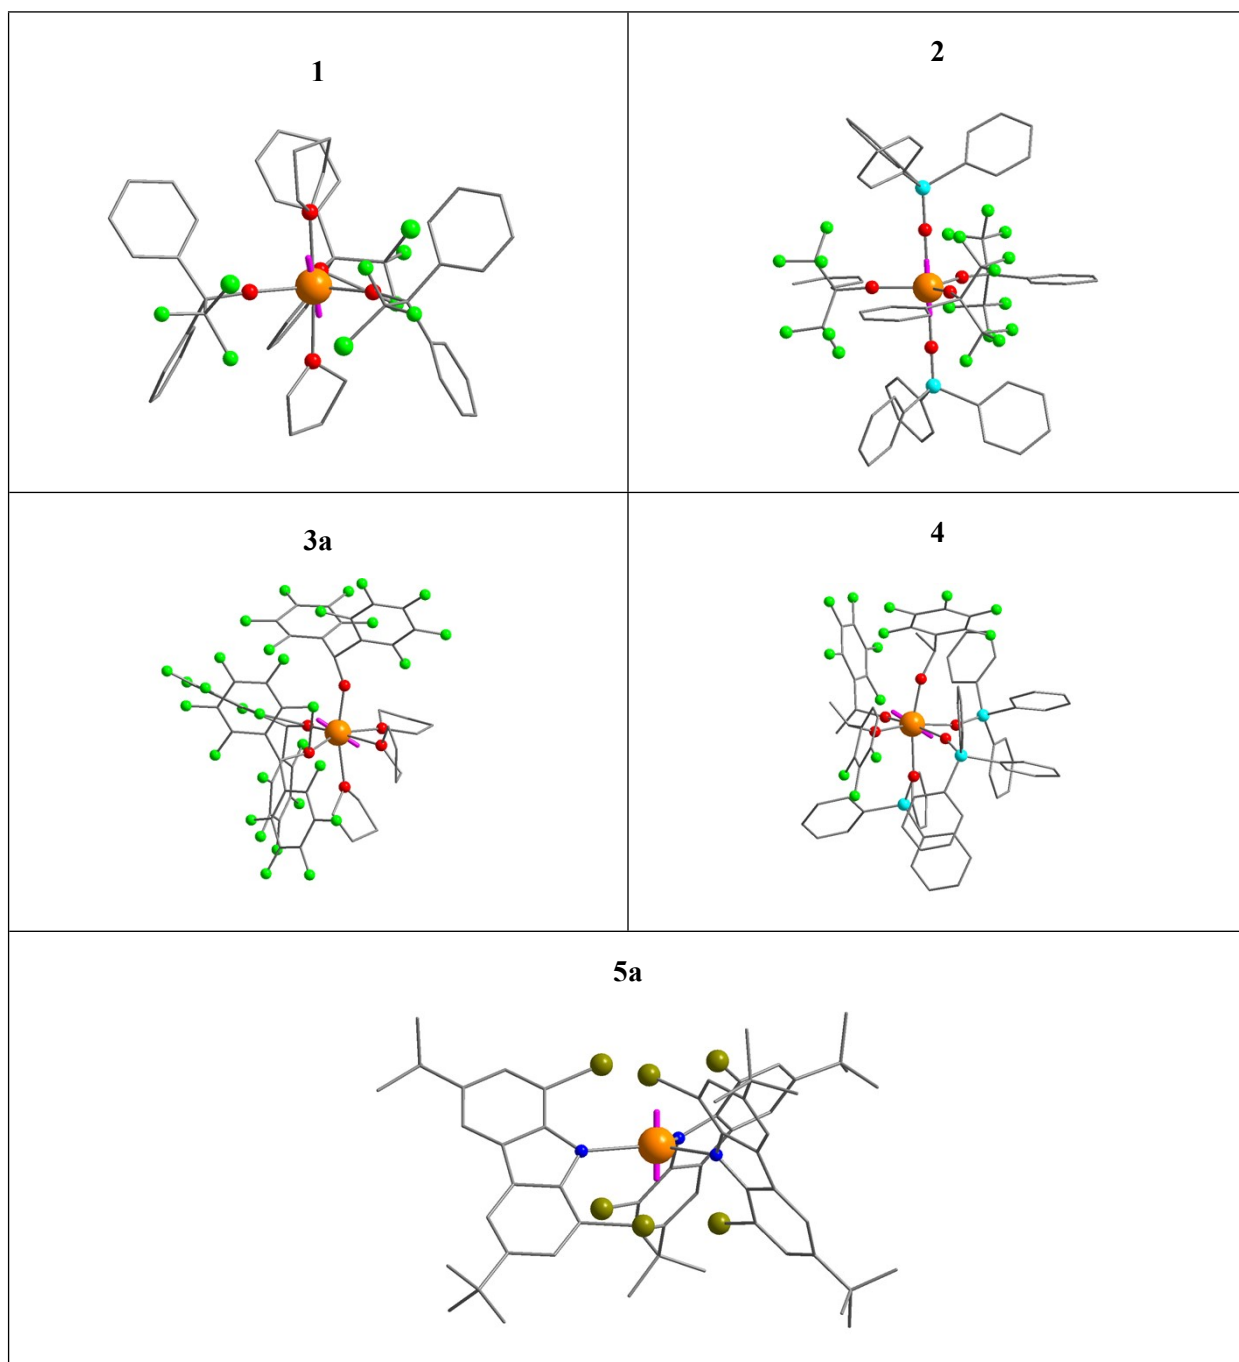

**Figure S7:** Anisotropic axes (purple) for the KD ground state obtained from the *ab initio* calculations.

**Table S1:** Crystal data and structure refinement details for **1-5**.

|                                                                                                         | <b>1</b>                                                                        | <b>2</b>                                                                        | <b>3</b>                                                         | <b>4</b>                                                                                                             | <b>5</b>                                                         |
|---------------------------------------------------------------------------------------------------------|---------------------------------------------------------------------------------|---------------------------------------------------------------------------------|------------------------------------------------------------------|----------------------------------------------------------------------------------------------------------------------|------------------------------------------------------------------|
| Formula                                                                                                 | C <sub>50</sub> H <sub>46</sub> Cl <sub>3</sub> ErF <sub>6</sub> O <sub>5</sub> | C <sub>63</sub> H <sub>45</sub> ErF <sub>18</sub> O <sub>5</sub> P <sub>2</sub> | C <sub>51</sub> H <sub>27</sub> ErF <sub>30</sub> O <sub>6</sub> | C <sub>78</sub> H <sub>57</sub> ErF <sub>15</sub> O <sub>6</sub> P <sub>3</sub> ,<br>C <sub>4</sub> H <sub>8</sub> O | C <sub>60</sub> H <sub>66</sub> Br <sub>6</sub> ErN <sub>3</sub> |
| <i>M</i>                                                                                                | 1114.48                                                                         | 1453.56                                                                         | 1472.98                                                          | 1707.51                                                                                                              | 1475.87                                                          |
| <i>T</i> , K                                                                                            | 100                                                                             | 100                                                                             | 100                                                              | 100                                                                                                                  | 100                                                              |
| Crystal system                                                                                          | Monoclinic                                                                      | Trigonal                                                                        | Triclinic                                                        | Monoclinic                                                                                                           | Triclinic                                                        |
| Space group                                                                                             | <i>P</i> 2 <sub>1</sub> / <i>n</i>                                              | <i>R</i> -3                                                                     | <i>P</i> -1                                                      | <i>P</i> 2 <sub>1</sub> / <i>n</i>                                                                                   | <i>P</i> -1                                                      |
| <i>Z</i> ( <i>Z'</i> )                                                                                  | 4 (1)                                                                           | 6 (1/3)                                                                         | 4 (2)                                                            | 4 (1)                                                                                                                | 2 (1)                                                            |
| <i>a</i> , Å                                                                                            | 15.7102(3)                                                                      | 18.885(12)                                                                      | 12.326(4)                                                        | 12.3834(3)                                                                                                           | 16.6814(8)                                                       |
| <i>b</i> , Å                                                                                            | 15.8031(3)                                                                      | 18.885(12)                                                                      | 19.924(7)                                                        | 13.1486(3)                                                                                                           | 18.4271(9)                                                       |
| <i>c</i> , Å                                                                                            | 18.5149(3)                                                                      | 28.24(2)                                                                        | 22.015(8)                                                        | 45.3406(12)                                                                                                          | 20.8840(10)                                                      |
| <i>α</i> , deg                                                                                          | 90                                                                              | 90                                                                              | 79.645(8)                                                        | 90                                                                                                                   | 106.146(2)                                                       |
| <i>β</i> , deg                                                                                          | 92.7490(10)                                                                     | 90                                                                              | 76.492(8)                                                        | 93.0260(10)                                                                                                          | 102.283(2)                                                       |
| <i>γ</i> , deg                                                                                          | 90                                                                              | 120                                                                             | 89.899(8)                                                        | 90                                                                                                                   | 101.556(2)                                                       |
| <i>V</i> , Å <sup>3</sup>                                                                               | 4591.40(14)                                                                     | 8722(13)                                                                        | 5167(3)                                                          | 7372.3(3)                                                                                                            | 5790.3(5)                                                        |
| <i>d</i> <sub>calcd</sub> , g·cm <sup>-3</sup>                                                          | 1.612                                                                           | 1.660                                                                           | 1.894                                                            | 1.538                                                                                                                | 1.693                                                            |
| <i>μ</i> , mm <sup>-1</sup>                                                                             | 20.74                                                                           | 16.07                                                                           | 17.84                                                            | 12.97                                                                                                                | 5.629                                                            |
| <i>F</i> <sub>000</sub>                                                                                 | 2236                                                                            | 4339                                                                            | 2876                                                             | 3444                                                                                                                 | 2900                                                             |
| <i>θ</i> <sub>max</sub> , deg                                                                           | 54                                                                              | 50                                                                              | 50                                                               | 50                                                                                                                   | 25.03                                                            |
| Number of measured refl.                                                                                | 52446                                                                           | 41894                                                                           | 45934                                                            | 70715                                                                                                                | 65945                                                            |
| Number of independent refl. ( <i>R</i> <sub>int</sub> )                                                 | 10022                                                                           | 3415                                                                            | 18185                                                            | 13600                                                                                                                | 20392 (0.0702)                                                   |
| Observed refl. [ <i>I</i> > 2σ( <i>I</i> )]                                                             | 8557                                                                            | 1610                                                                            | 12301                                                            | 12267                                                                                                                | 14292                                                            |
| Parameters                                                                                              | 603                                                                             | 257                                                                             | 1586                                                             | 1005                                                                                                                 | 1330                                                             |
| <i>R</i> <sub>1</sub> and <i>wR</i> <sub>2</sub> [ <i>F</i> <sup>2</sup> > 2σ( <i>F</i> <sup>2</sup> )] | 0.0256                                                                          | 0.1080                                                                          | 0.1258                                                           | 0.0722                                                                                                               | 0.0531, 0.0924                                                   |
| <i>R</i> <sub>1</sub> and <i>wR</i> <sub>2</sub> (all data)                                             | 0.0586                                                                          | 0.3017                                                                          | 0.3648                                                           | 0.1482                                                                                                               | 0.0898, 0.1039                                                   |
| <i>S</i> ( <i>F</i> <sup>2</sup> )                                                                      | 1.013                                                                           | 1.055                                                                           | 1.258                                                            | 1.230                                                                                                                | 1.054                                                            |
| Residual electron density ( <i>d</i> <sub>max</sub> / <i>d</i> <sub>min</sub> ), e·Å <sup>-3</sup>      | 1.160/-0.563                                                                    | 1.672/-0.773                                                                    | 6.435/-1.876                                                     | 3.234/-5.360                                                                                                         | 1.91 / -1.51                                                     |

**Table S2:** SHAPE<sup>1</sup> analysis for 1-5.

|                                                                                                                                              |   | <b>PP</b> | <b>VOC</b> | <b>TBPY</b> | <b>SPY</b>  | <b>JTBPY</b> |
|----------------------------------------------------------------------------------------------------------------------------------------------|---|-----------|------------|-------------|-------------|--------------|
| <b>1</b>                                                                                                                                     |   | 33.378    | 4.912      | 0.750       | 3.954       | 1.452        |
| <b>2</b>                                                                                                                                     |   | 36.962    | 7.225      | 0.171       | 5.553       | 2.072        |
| PP: Pentagon<br>vOC: Vacant octahedron<br>TBPY: Trigonal bipyramid<br>SPY: Spherical square pyramid<br>JTBPY: Johnson trigonal bipyramid J12 |   |           |            |             |             |              |
|                                                                                                                                              |   | <b>HP</b> | <b>PPY</b> | <b>OC</b>   | <b>TPR</b>  | <b>JPPY</b>  |
| <b>3</b>                                                                                                                                     | a | 32.015    | 26.678     | 0.618       | 14.943      | 30.204       |
|                                                                                                                                              | b | 31.859    | 26.974     | 0.608       | 15.682      | 30.496       |
| <b>4</b>                                                                                                                                     |   | 33.185    | 29.265     | 0.232       | 16.279      | 32.916       |
| HP: Hexagon<br>PPY: Pentagonal Pyramid<br>OC: Octahedron<br>TPR: Trigonal Prism<br>JPPY: Johnson Pentagonal Pyramid                          |   |           |            |             |             |              |
|                                                                                                                                              |   | <b>TP</b> | <b>vT</b>  | <b>fvOC</b> | <b>mvOC</b> |              |
| <b>5</b>                                                                                                                                     | a | 0.156     | 2.587      | 10.157      | 8.525       |              |
|                                                                                                                                              | b | 0.110     | 2.830      | 10.644      | 8.144       |              |
| TP: Trigonal<br>vT: Vacant tetrahedron<br>fvOC: fac-Trivacant octahedron<br>mvOC: mer-Trivacant octahedron                                   |   |           |            |             |             |              |

**Table S3:** Fitting of the Cole-Cole plots with a generalized Debye model under a 0 Oe dc field for 5.

| <i>T</i> (K) | $\chi_s$ (cm <sup>3</sup> . mol <sup>-1</sup> ) | $\chi_T$ (cm <sup>3</sup> . mol <sup>-1</sup> ) | $\alpha$ |
|--------------|-------------------------------------------------|-------------------------------------------------|----------|
| 1.8          | 0.83961                                         | 0.89208                                         | 0.218    |
| 2.28         | 0.71152                                         | 0.7491                                          | 0.348    |
| 2.75         | 0.62074                                         | 0.65119                                         | 0.286    |
| 3.23         | 0.55042                                         | 0.57406                                         | 0.460    |

**Table S4:** Fitting of the Cole-Cole plots with a generalized Debye model under a 1500 Oe dc field for **1**.

| $T$ (K) | $\chi_S$ (cm <sup>3</sup> . mol <sup>-1</sup> ) | $\chi_T$ (cm <sup>3</sup> . mol <sup>-1</sup> ) | $\alpha$ |
|---------|-------------------------------------------------|-------------------------------------------------|----------|
| 1.80007 | 0.94484                                         | 3.41428                                         | 0.17811  |
| 1.90036 | 0.92478                                         | 3.27336                                         | 0.1692   |
| 2.00004 | 0.89931                                         | 3.1682                                          | 0.16787  |
| 2.10008 | 0.90788                                         | 3.02616                                         | 0.1449   |
| 2.29985 | 0.86774                                         | 2.85356                                         | 0.1252   |
| 2.39974 | 0.85137                                         | 2.76501                                         | 0.11461  |
| 2.49973 | 0.76688                                         | 2.66186                                         | 0.11092  |

**Table S5:** Fitting of the Cole-Cole plots with a generalized Debye model under a 1000 Oe dc field for **5**.

| $T$ (K) | $\chi_S$ (cm <sup>3</sup> . mol <sup>-1</sup> ) | $\chi_T$ (cm <sup>3</sup> . mol <sup>-1</sup> ) | $\alpha$ |
|---------|-------------------------------------------------|-------------------------------------------------|----------|
| 1.8     | 0.78533                                         | 0.80254                                         | 0.89392  |
| 2.31    | 0.66894                                         | 0.68337                                         | 0.88514  |
| 2.83    | 0.5872                                          | 0.59646                                         | 0.91402  |
| 3.35    | 0.50998                                         | 0.53783                                         | 0.65642  |
| 3.86    | 0.455                                           | 0.48804                                         | 0.46633  |
| 4.38    | 0.41408                                         | 0.44538                                         | 0.42508  |
| 4.9     | 0.38139                                         | 0.40888                                         | 0.46549  |
| 5.41    | 0.35039                                         | 0.3811                                          | 0.20038  |
| 5.93    | 0.32655                                         | 0.35451                                         | 0.20325  |
| 6.45    | 0.30625                                         | 0.3333                                          | 0.04604  |
| 7       | 0.28899                                         | 0.31402                                         | 0.00779  |
| 7.48    | 0.27299                                         | 0.29518                                         | 0.19483  |
| 8       | 0.25761                                         | 0.2781                                          | 0.33473  |

**Table S6:** *Ab initio* calculated energies, g-tensor main values of the n<sup>th</sup> KD doublet for the ground multiplet  $J = 15/2$  obtained for **1**.

| KD       | Energy (cm <sup>-1</sup> ) | $g_x$      | $g_y$      | $g_z$       | Wavefunction (only component with > 10 % are given)                                                      |
|----------|----------------------------|------------|------------|-------------|----------------------------------------------------------------------------------------------------------|
| <b>1</b> | 0.00                       | 0.36194471 | 0.59827551 | 15.76201956 | 52.5%   $\pm 13/2$ >; 32.9%   $\pm 15/2$ >                                                               |
| <b>2</b> | 26.685                     | 0.32466487 | 0.55290517 | 13.63356657 | 36.0%   $\pm 9/2$ >; 34.6%   $\pm 11/2$ >; 12.2%   $\pm 7/2$ >; 10.2%   $\pm 13/2$ >                     |
| <b>3</b> | 116.298                    | 2.74126368 | 3.71106997 | 9.30630729  | 38.8%   $\pm 11/2$ >; 25.1%   $\pm 7/2$ >; 10.9%   $\pm 9/2$ >; 10.1%   $\pm 3/2$ >                      |
| <b>4</b> | 174.853                    | 8.52102702 | 6.58951045 | 2.48264088  | 25.5%   $\pm 5/2$ >; 24.1%   $\pm 9/2$ >; 18.4%   $\pm 7/2$ >; 17.18%   $\pm 1/2$ >;                     |
| <b>5</b> | 207.456                    | 0.78097429 | 1.48152853 | 15.60255568 | 28.1%   $\pm 3/2$ >; 19.0%   $\pm 5/2$ >; 17.8%   $\pm 1/2$ >; 16.0%   $\pm 7/2$ >; 14.9%   $\pm 9/2$ >; |
| <b>6</b> | 245.462                    | 0.03125194 | 2.82254607 | 14.27971112 | 49.9%   $\pm 15/2$ >; 24.0%   $\pm 13/2$ >                                                               |
| <b>7</b> | 252.577                    | 0.66561281 | 3.50378641 | 11.83400606 | 21.2%   $\pm 5/2$ >; 21.0%   $\pm 3/2$ >; 14.1%   $\pm 7/2$ >; 14.0%   $\pm 15/2$ >                      |
| <b>8</b> | 338.113                    | 0.03156249 | 0.11098655 | 17.73860739 | 42.2%   $\pm 1/2$ >; 29.1%   $\pm 3/2$ >; 15.4%   $\pm 7/2$ >                                            |

**Table S7:** *Ab initio* calculated energies, g-tensor main values of the n<sup>th</sup> KD doublet for the ground multiplet  $J = 15/2$  obtained for **2**.

| KD | Energy (cm <sup>-1</sup> ) | $g_x$       | $g_y$      | $g_z$       | Wavefunction (only component with > 10 % are given) |
|----|----------------------------|-------------|------------|-------------|-----------------------------------------------------|
| 1  | 0.00                       | 0.79758565  | 0.81299521 | 12.90155100 | 98.6%  ±11/2>                                       |
| 2  | 17.462                     | 0.75078663  | 0.75209747 | 15.4019330  | 99.1%  ±13/2>                                       |
| 3  | 65.535                     | 0.03902774  | 0.05941930 | 10.10499247 | 95.5%  ±9/2>                                        |
| 4  | 118.378                    | 7.52598206  | 7.48472464 | 4.91877105  | 75.8%  ±7/2>; 23.7%  ±5/2 >                         |
| 5  | 153.680                    | 10.08425816 | 8.44208269 | 0.84970268  | 93.6%  ±1/2>                                        |
| 6  | 162.302                    | 0.55084622  | 0.99451007 | 3.01525951  | 95.2%  ±3/2>                                        |
| 7  | 170.627                    | 7.96231982  | 7.49852299 | 2.26873026  | 72%  ±5/2>; 23.7%  7±/2>;                           |
| 8  | 330.693                    | 0.00003599  | 0.00020951 | 17.92189517 | 99.9%  ±15/2>                                       |

**Table S8:** *Ab initio* calculated energies, g-tensor main values of the n<sup>th</sup> KD doublet for the ground multiplet  $J = 15/2$  obtained for **3**.

| 3a |                            |            |            |             |                                                                         |
|----|----------------------------|------------|------------|-------------|-------------------------------------------------------------------------|
| KD | Energy (cm <sup>-1</sup> ) | $g_x$      | $g_y$      | $g_z$       | Wavefunction (only component with > 10 % are given)                     |
| 1  | 0.00                       | 0.15936250 | 0.31019731 | 16.51981489 | 81.3%  ±15/2>; 15.7%  ±9/2>                                             |
| 2  | 55.498                     | 0.62353324 | 0.84436626 | 13.4464878  | 69.4%  ±13/2>; 22.9%  ±7/2>                                             |
| 3  | 120.461                    | 2.17843669 | 3.76615881 | 9.01800905  | 46.8%  ±11/2>; 33.7%  ±5/2>                                             |
| 4  | 165.184                    | 0.00996387 | 4.39913270 | 10.92167487 | 41.6%  ±3/2>; 37.2%  ±1/2>                                              |
| 5  | 180.734                    | 2.44785680 | 4.94520631 | 10.66668572 | 47.7%  ±1/2>; 29.1%  ±3/2>                                              |
| 6  | 283.934                    | 0.09404577 | 0.68825241 | 16.48322742 | 29.1%  ±5/2>; 20.3%  ±9/2>; 16.3%  ±3/2>; 14.4%  ±7/2>; 11.4%  ±11/2>;  |
| 7  | 332.401                    | 0.09849091 | 2.39080804 | 13.00117483 | 28.1%  ±11/2>; 16.6%  ±5/2>; 14.0%  ±9/2>                               |
| 8  | 341.174                    | 0.05204274 | 2.29318251 | 13.15470965 | 33.4%  ±9/2>; 27.9%  ±7/2>; 14.2%  ±13/2>                               |
| 3b |                            |            |            |             |                                                                         |
| KD | Energy (cm <sup>-1</sup> ) | $g_x$      | $g_y$      | $g_z$       | Wavefunction (only component with > 10 % are given)                     |
| 1  | 0.00                       | 0.14512192 | 0.31918615 | 16.48118915 | 81.0%  ±15/2>; 14.7%  ±9/2>                                             |
| 2  | 50.444                     | 0.70970909 | 0.96179950 | 13.78607519 | 66.4%  ±13/2>; 16.5%  ±7/2>                                             |
| 3  | 120.368                    | 1.82460497 | 2.94628488 | 9.60736636  | 45.9%  ±11/2>; 22.6%  ±5/2>; 15.7%  ±7/2>                               |
| 4  | 160.172                    | 0.39086475 | 4.20097429 | 12.08423915 | 49.0%  ±3/2>; 25.5%  ±1/2>; 11.2%  ±5/2>                                |
| 5  | 181.138                    | 2.62284623 | 5.61732347 | 9.08405140  | 60.2%  ±1/2>; 11.1%  ±3/2>; 10.6%  ±5/2>                                |
| 6  | 301.947                    | 0.57005445 | 0.82285788 | 15.74600398 | 26.4%  ±3/2>; 25.1%  ±5/2>; 21.3%  ±9/2>                                |
| 7  | 339.452                    | 0.26556833 | 1.24151654 | 16.48413235 | 32.4%  ±7/2>; 15.6%  ±1/2>; 15.1%  ±9/2>; 13.5%  ±5/2>; 12.1%  ±13/2>;  |
| 8  | 367.690                    | 0.11808566 | 0.25181705 | 17.44290560 | 28.3%  ±9/2>; 22.4%  ±7/2>; 18.2%  ±11/2>; 11.8%  ±13/2>; 11.7%  ±3/2>; |

**Table S9:** *Ab initio* calculated energies, g-tensor main values of the n<sup>th</sup> KD doublet for the ground multiplet  $J = 15/2$  obtained for **4**.

| KD | Energy (cm <sup>-1</sup> ) | $g_x$      | $g_y$      | $g_z$       | Wavefunction (only component with > 10 % are given)                                 |
|----|----------------------------|------------|------------|-------------|-------------------------------------------------------------------------------------|
| 1  | 0.00                       | 0.46264204 | 1.00682194 | 15.46819953 | 70.8%  ±15/2>; 14.6%  ±7/2>                                                         |
| 2  | 34.482                     | 2.29606896 | 4.08856018 | 12.18589656 | 43.5%  ±13/2>; 18.6%  ±7/2>; 16.3%  ±11/2>                                          |
| 3  | 72.163                     | 0.04839228 | 1.59675796 | 14.73818601 | 40.6%  ±1/2>; 32.1%  ±3/2>; 14.5%  ±5/2>                                            |
| 4  | 88.658                     | 6.80581425 | 5.45879715 | 2.75997663  | 20.2%  ±11/2>; 17.3%  ±7/2>; 16.5%  ±2/2>; 16.2%  ±5/2>; 13.1%  ±9/2>               |
| 5  | 128.277                    | 1.46492288 | 1.87315280 | 11.93716450 | 35.3%  ±1/2>; 21.1%  ±3/2>; 15.5%  ±5/2>                                            |
| 6  | 285.527                    | 1.13996043 | 2.05331026 | 14.19567575 | 23.8%  ±9/2>; 20.0%  ±7/2> 15.2%  ±11/2>; 11.9%  ±13/2>; 11.7%  ±3/2>; 10.1%  ±5/2> |
| 7  | 326.051                    | 0.16847203 | 2.92759879 | 14.39351091 | 27.6%  ±5/2>; 21.7%  ±7/2>; 15.6%  ±11/2>; 11.8%  ±3/2>; 10.4%  ±1/2>               |
| 8  | 359.189                    | 0.05997224 | 0.95856972 | 16.67255039 | 28.0%  ±9/2>; 22.6%  ±11/2>; 21.6%  ±13/2>; 11.9%  ±7/2>                            |

**Table S10:** *Ab initio* calculated energies, g-tensor main values of the n<sup>th</sup> KD doublet for the ground multiplet  $J = 15/2$  obtained for **5**.

| 5a |                            |            |            |             |                                                          |
|----|----------------------------|------------|------------|-------------|----------------------------------------------------------|
| KD | Energy (cm <sup>-1</sup> ) | $g_x$      | $g_y$      | $g_z$       | Wavefunction (only component with > 10 % are given)      |
| 1  | 0.00                       | 0.02529856 | 0.03726463 | 17.78194475 | 97.9%  ±15/2>                                            |
| 2  | 171.549                    | 1.15623517 | 5.22463722 | 10.19226168 | 44.6%  ±9/2>; 22.4%  ±13/2>; 11.1%  ±7/2>                |
| 3  | 185.021                    | 0.07910381 | 3.92043253 | 7.86254799  | 37.8%  ±9/2>; 26.8%  ±13/2>; 15.9%  ±11/2>; 10.7%  ±7/2> |
| 4  | 195.549                    | 1.02091528 | 2.61011850 | 9.75125540  | 61.7%  ±11/2>; 21.5%  ±13/2>; 10.5%  ±5/2>               |
| 5  | 205.770                    | 2.36186776 | 5.12317032 | 9.92125043  | 41.7%  ±7/2>; 28.0%  ±13/2>; 14.3%  ±5/2>                |
| 6  | 370.647                    | 8.75738481 | 6.19116984 | 2.40606448  | 69.0%  ±5/2>; 23.4%  ±7/2>                               |
| 7  | 442.973                    | 2.28963234 | 3.46661799 | 5.66178084  | 82.9%  ±3/2>                                             |
| 8  | 509.824                    | 0.71759192 | 4.32950223 | 13.74094096 | 83.9%  ±1/2>                                             |
| 5b |                            |            |            |             |                                                          |
| KD | Energy (cm <sup>-1</sup> ) | $g_x$      | $g_y$      | $g_z$       | Wavefunction (only component with > 10 % are given)      |
| 1  | 0.000                      | 0.01020999 | 0.01655472 | 17.79970508 | 98.1%  ±15/2>                                            |
| 2  | 179.856                    | 8.84277516 | 6.01254454 | 0.19706720  | 77.3%  ±9/2>                                             |
| 3  | 191.573                    | 3.98546980 | 2.95495764 | 0.67307761  | 29.5%  ±11/2>; 28.4%  ±13/2>; 20.1%  ±7/2>; 10.9%  ±9/2> |
| 4  | 203.827                    | 1.52508654 | 2.62571140 | 8.01116051  | 55.2%  ±11/2>; 29.1%  ±7/2>                              |
| 5  | 210.718                    | 3.61381869 | 5.27619287 | 10.21368291 | 58.7%  ±13/2>; 24.2%  ±7/2>                              |
| 6  | 377.757                    | 8.72190425 | 5.84721757 | 2.74921564  | 72.4%  ±5/2>; 20.9%  ±7/2>                               |
| 7  | 463.215                    | 1.30507688 | 2.66293602 | 4.49909167  | 88.7%  ±3/2>                                             |
| 8  | 530.747                    | 0.90345492 | 6.30296829 | 12.23013262 | 88.6%  ±1/2>                                             |

**Table S11:** Weight of individual crystal-field parameters on the crystal-field splitting obtained by *Ab initio* for **5a**. Only values larger than 1% are given.

| $k$ | $q$ | $B_k^q$ 5a | Weight in % 5a |
|-----|-----|------------|----------------|
| 2   | 0   | -2.27E+00  | 28.9095836     |
| 6   | -6  | 9.02E-05   | 19.5733841     |
| 6   | 0   | -5.40E-05  | 11.7122942     |
| 6   | -3  | 3.35E-05   | 7.2607183      |
| 4   | 0   | 1.89E-03   | 4.37074636     |
| 2   | -2  | -3.33E-01  | 4.25072347     |
| 4   | -3  | -1.31E-03  | 3.04205002     |
| 6   | 3   | -1.27E-05  | 2.75024222     |
| 6   | 5   | -1.14E-05  | 2.47999549     |
| 6   | -2  | -1.07E-05  | 2.31696919     |
| 4   | 3   | 9.13E-04   | 2.11253214     |
| 4   | 4   | 8.89E-04   | 2.05728315     |
| 6   | 4   | -7.72E-06  | 1.67541902     |

**Table S12:** Weight of individual crystal-field parameters on the crystal-field splitting obtained by *Ab initio* for **5b**. Only values larger than 1% are given.

| <i>k</i> | <i>q</i> | $B_k^q$ <b>5b</b> | <b>Weight % 5b</b> |
|----------|----------|-------------------|--------------------|
| 2        | 0        | -2.35E+00         | 29.0961027         |
| 6        | -6       | -8.73E-05         | 18.362576          |
| 6        | 0        | -6.05E-05         | 12.715981          |
| 6        | -3       | -2.82E-05         | 5.92240496         |
| 6        | 3        | -2.63E-05         | 5.53899602         |
| 4        | 0        | 2.19E-03          | 4.91077444         |
| 6        | 6        | -2.02E-05         | 4.25245739         |
| 4        | -3       | 1.37E-03          | 3.0626941          |
| 4        | 3        | 1.18E-03          | 2.65438539         |
| 4        | 4        | -1.00E-03         | 2.2427206          |
| 2        | -2       | -1.49E-01         | 1.83966372         |
| 6        | -2       | -7.48E-06         | 1.57256301         |
| 2        | 2        | -1.21E-01         | 1.49058188         |
| 4        | -4       | -4.53E-04         | 1.01482646         |

1 D. Casanova, M. Llunell, P. Alemany and S. Alvarez, *Chem. Eur. J.*, 2005, **11**, 1479-1494.
